# Supplementary material for: Interaction with tumor-associated macrophages promotes PRL-3-induced invasion of colorectal cancer cells via MAPK pathway-induced EMT and NF-κB signaling-induced angiogenesis
Source: PubMed Central journal article supplement — Oncol Rep. 2019 Mar 7;41(5):2790–802. doi: 10.3892/or.2019.7049 (PMC6448091; doi:10.3892/or.2019.7049), 2019-03-07

Figure S1. Expression of PRL-3 in LoVo and HT29 cell lines. \*\* $P < 0.01$  vs. respective control. NC, negative control; LoVo-P, LoVo PRL-3 overexpression; HT29-P, HT29 PRL-3 knockdown; PRL-3, phosphatase of regenerating liver-3.

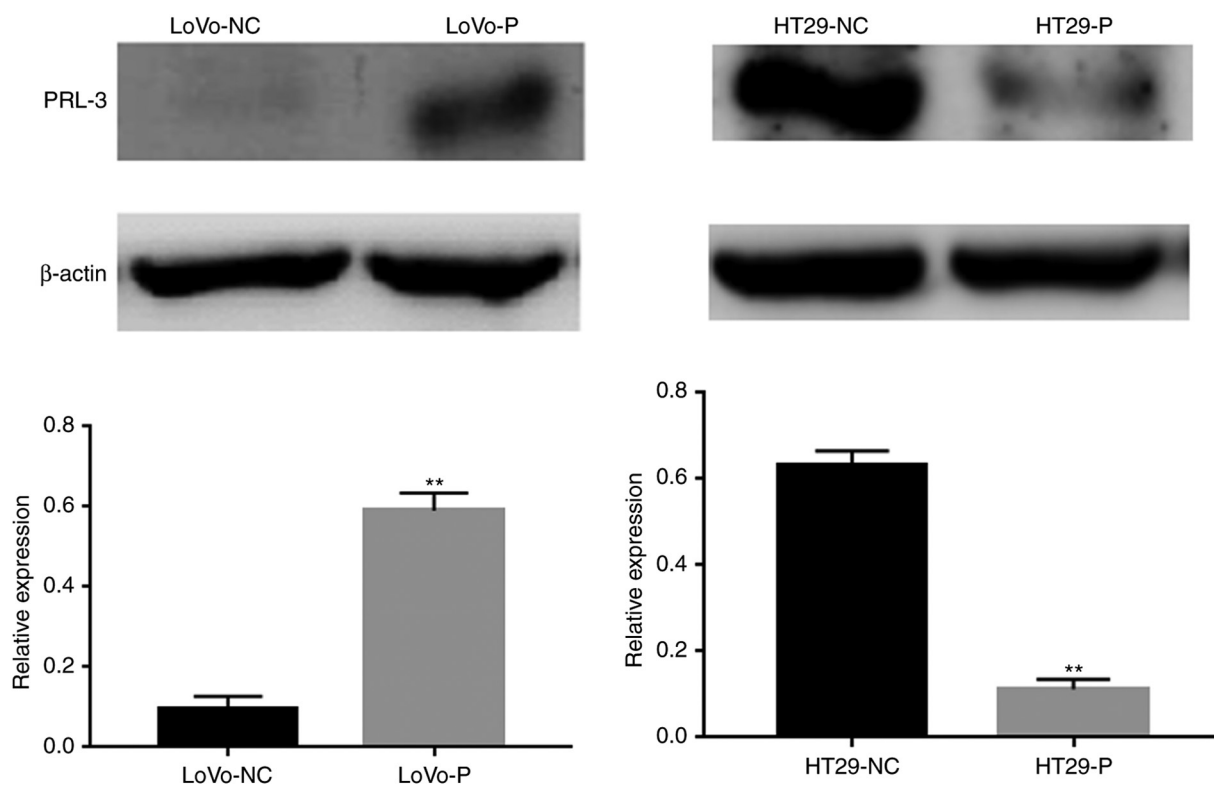

Figure S2. Detection of CD68 as marker of tumor-associated macrophages in xenografts. NC, negative control; LoVo-P, LoVo PRL-3 overexpression; HT29-P, HT29 PRL-3 knockdown; PRL-3, phosphatase of regenerating liver-3.

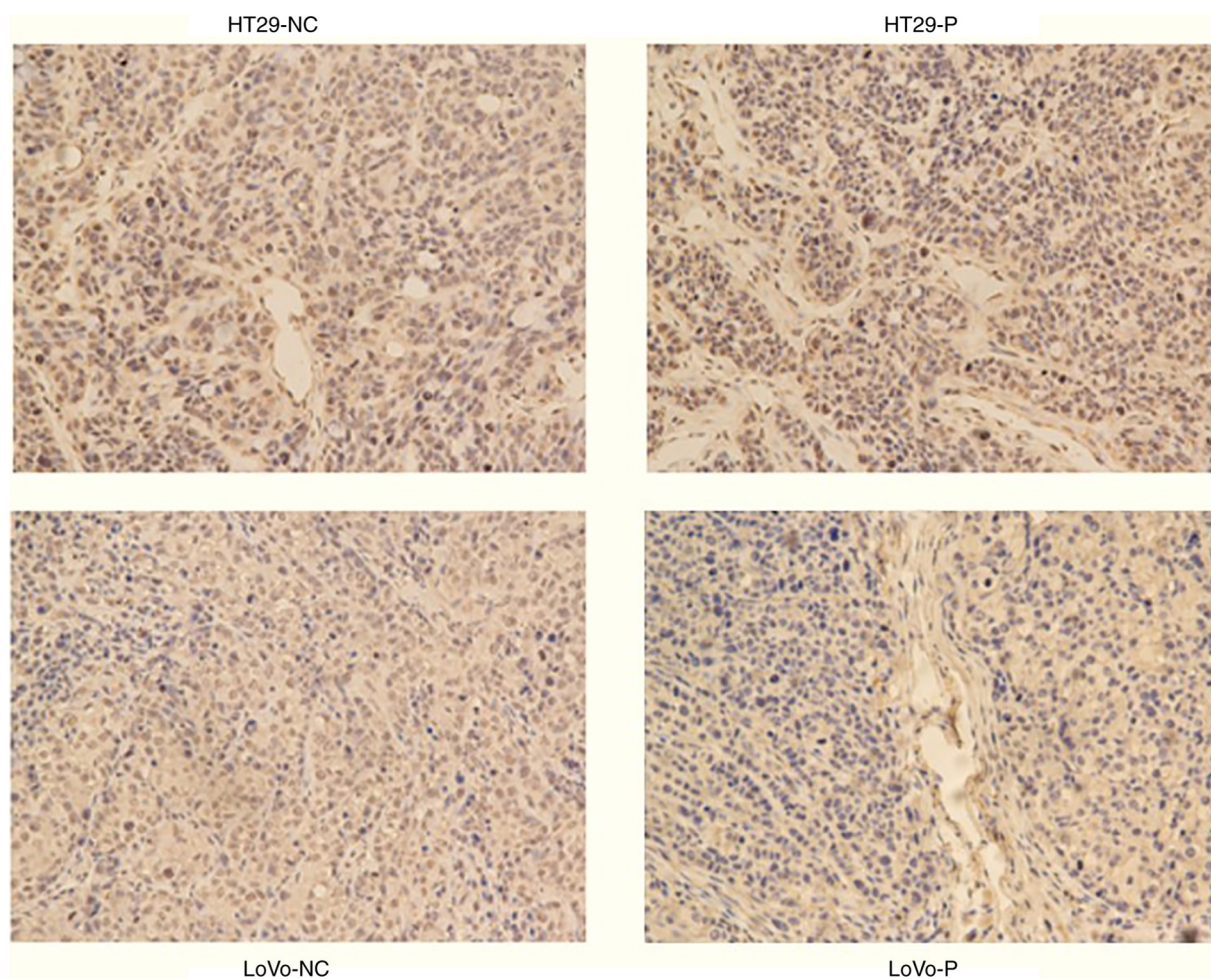

Supplement: Supplementary_Data.pdf [file Supplementary_Data.pdf]
